# Supplementary material for: A novel approach to prepare graphene oxide/soluble polyimide composite films with a low dielectric constant and high mechanical properties
Source: Royal Society of Chemistry journal article supplement (doi:10.1039/c4ra07716d), 2014-01-01
Supplement: c4ra07716d1.pdf [file c4ra07716d1.pdf]

## Supporting information

The chemical structural information for monomer polymerization, imidization and crosslinking reactions is exhibited in Fig. S1.

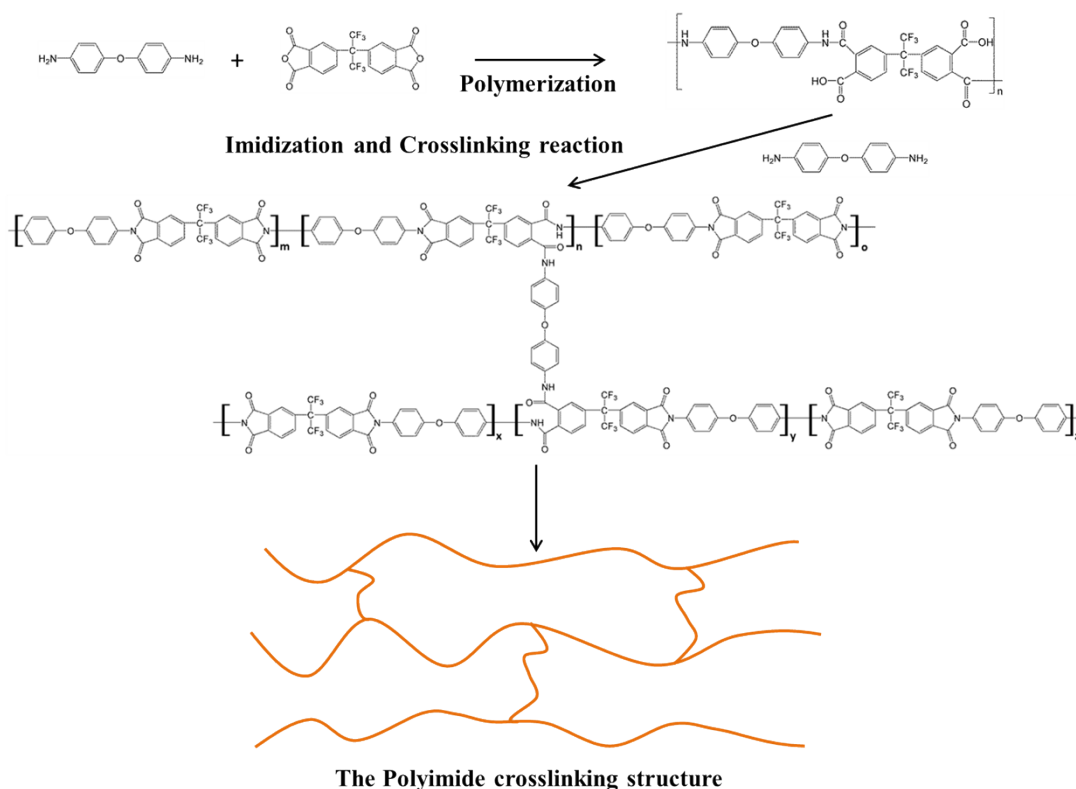

Fig. S1 The polymerization, imidization and crosslinking reaction mechanism of SPI.
